# Supplementary material for: Transparent low-voltage-driven soft actuators with silver nanowires Joule heaters
Source: Royal Society of Chemistry journal article supplement (doi:10.1039/d1py00837d), 2021-01-01
Supplement: d1py00837d1.pdf [file d1py00837d1.pdf]

## Supporting information

### Transparent Low-Voltage-Driven Soft Actuators with Silver Nanowire Joule Heaters

*Jian Liu<sup>a</sup>, Lulu Xu<sup>a</sup>, Chaobin He<sup>b,c</sup>, Xuehong Lu<sup>a\*</sup>, FuKe Wang<sup>b\*</sup>*

<sup>a</sup> School of Materials Science and Engineering, Nanyang Technological University, 50 Nanyang Avenue, 639798, Singapore.

<sup>b</sup> Department of polymer composites (PMC), Institute of Materials Research and Engineering, 2 Fusionopolis Way, 138634, Singapore.

<sup>c</sup> Department of Materials Science and Engineering, National University of Singapore, 117574, Singapore

**Keywords.** Transparent, soft actuators, electro-thermal, liquid crystal, silver nanowire.

#### Corresponding authors:

Fuke Wang ([wangf@imre.a-star.edu.sg](mailto:wangf@imre.a-star.edu.sg))

Xuehong Lu ([asxhlu@ntu.edu.sg](mailto:asxhlu@ntu.edu.sg))

**Synthesis of ethyl 4-(allyloxy)benzoate.** But-3-en-1-ol (2.9 g, 40 mmol), 4-hydroxybenzoic acid ethyl ester (6.7 g, 41 mmol) and triphenyl phosphate (10.9 g, 40.0 mmol) were dissolved in 30 mL of dried THF. 20 mL of THF solution contained DEAD (7 mL, 40.0 mmol) was added dropwise into the above solution in an ice bath. The reaction mixture was stirred overnight at the room temperature under protection of nitrogen atmosphere. After filtering the produced white precipitate, solvent was removed via vacuum evaporation, then the obtained crude product was purified by silica flash column chromatography with hexane: EtOAc=20:1 as eluent to afford colorless oil (7.1 g, yield: 80%).

$^1\text{H}$  NMR (300 MHz,  $\text{CDCl}_3$ ):  $\delta$  8.02 (d, 2H), 6.92 (d, 2H), 5.85-5.98 (m, 1H), 5.12-5.24 (m, 2H), 4.33-4.40 (m, 2H), 4.06-4.12 (m, 2H), 1.40 (t, 3H).

**Synthesis of 4-(allyloxy)benzoic acid.** Compound 1 (7.7 g, 29 mmol) and excess sodium hydroxide were mixed and dissolved in mixed solution of ethanol/water (v/v, 1/1). The mixture solution was heated to reflux for 12 h. After cooling to room temperature, 1 M hydrochloric acid solution was added into solution to adjust pH to  $\sim 2$ . The resulted white precipitate was collected by filtration and washed with water for twice. The crude product was recrystallized from ethanol to give the white solid (6.1 g, yield: 90%).

$^1\text{H}$  NMR (300 MHz,  $\text{CDCl}_3$ ):  $\delta$  8.07 (d, 2H), 6.97 (d, 2H), 5.85-6.0 (m, 1H), 5.12-5.26 (m, 2H), 2.56-2.64 (m, 2H).

$^1\text{H}$  NMR (300 MHz,  $\text{DMSO}-d_6$ ):  $\delta$  12.59 (s, 1H), 7.86 (d, 2H), 7.0 (d, 2H), 5.84-5.92 (m, 1H), 5.04-5.23 (m, 2H), 4.05-4.26 (m, 2H).

**Synthesis of 4-methoxyphenyl-4-(but-3-en-1-yloxy)benzoate.** Compound 2 (3.25 g, 17 mmol), 4-methoxyphenol (2.3 g, 18.6 mmol), DMAP (1.05 g, 8.3 mmol) and DIC (2.6 g, 20.2 mmol) were dissolved in dried dichloromethane. The mixture solution was reacted for 24 h at ambient temperature. After filtering the produced white precipitate and evaporating to remove the solvent, the afforded crude solid was purified by flash column chromatography on silica gel using CH<sub>2</sub>Cl<sub>2</sub>: hexane=1:20 as the eluent to obtain white solid. (4 g, yield: 78%).

<sup>1</sup>H NMR (300 MHz, DMSO-*d*<sub>6</sub>): δ 8.06 (d, 2H), 7.08–7.20 (m, 4H), 6.97-7.02 (m, 2H), 5.84-5.96 (m, 1H), 5.08-5.24 (m, 2H), 4.13-4.19 (m, 2H), 3.76-3.81 (m, 3H), 2.60 (q, 2H).

**Synthesis of crosslinker 11UB (Compound 4).** Hydroquinone (1.1 g, 10 mmol) and potassium carbonate (4.8 g, 35 mmol) were dissolved in ethanol. After dropwise adding 11-chloro-1-undecene (4.5 g, 24 mmol) into the above mixture over 30 minutes, the mixture solution was heated to reflux for 18 h. The reaction mixture was poured into iced water and extracted three times with ether. After evaporation of solvents, the residue was purified by flash column chromatography on silica gel using petroleum ether/ethyl acetate (10:1) as the eluent to give the desired product 11UB (4.6 g, yield 60%).

<sup>1</sup>H NMR (300 MHz, CDCl<sub>3</sub>): δ 6.85 (s, 4H), 5.78-5.90 (m, 2H), 4.93-5.06 (m, 4H), 3.92 (t, 4H), 2.03-2.11 (m, 4H), 1.72-1.82 (m, 4H), 1.27-1.5 (m, 24H).

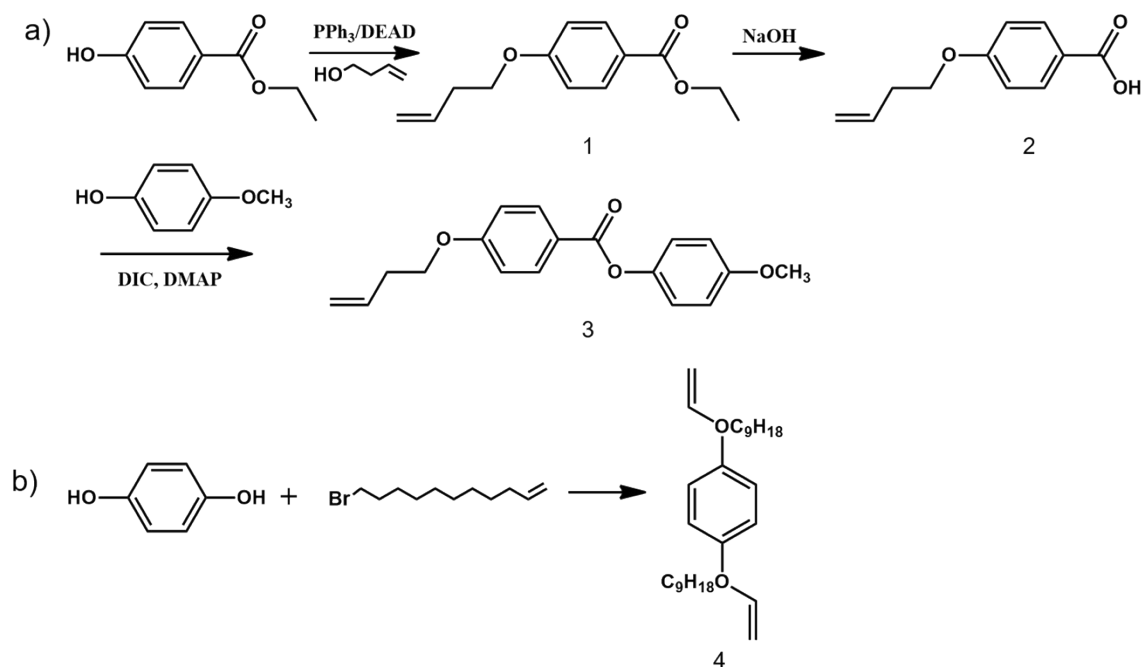

**Figure S1.** Synthesis routine of designed compound

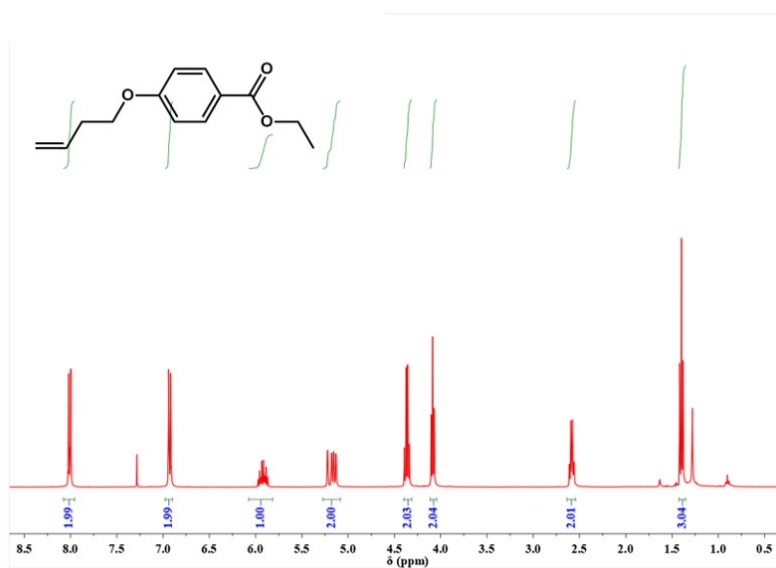

**Figure S2.**  $^1\text{H}$  NMR spectra of compound 1

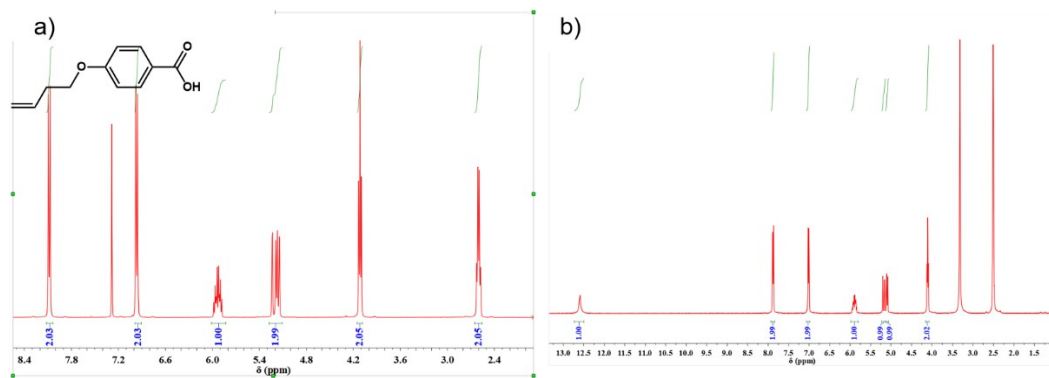

**Figure S3.**  $^1\text{H}$  NMR spectra of compound 2 in a)  $\text{CDCl}_3$  and b)  $\text{DMSO}-d_6$ .

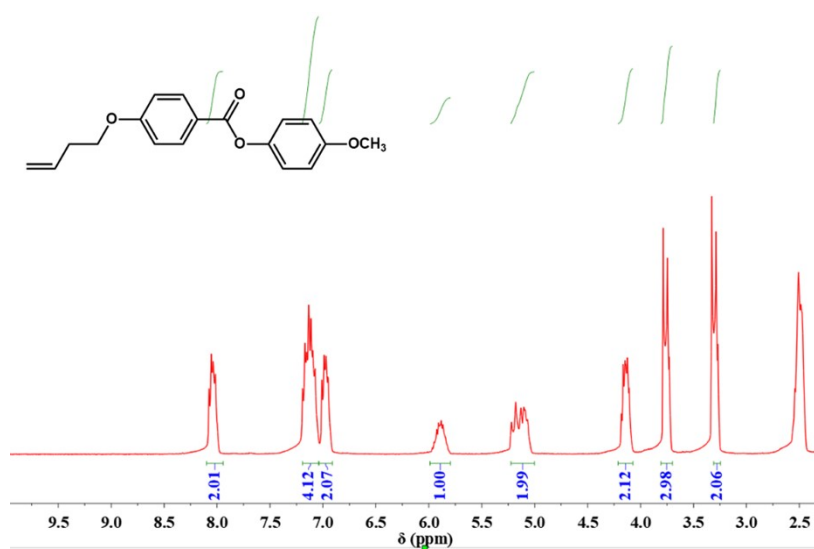

**Figure S4.**  $^1\text{H}$  NMR spectra of compound 3 in  $\text{DMSO}-d_6$ .

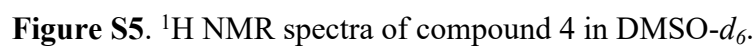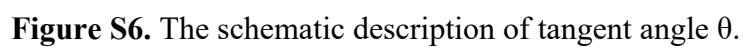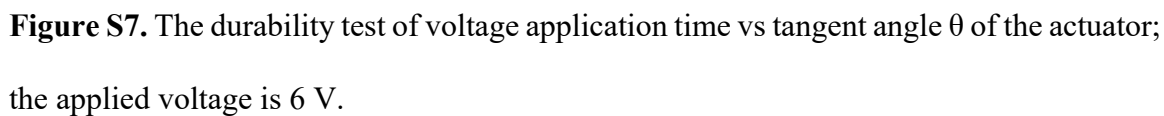

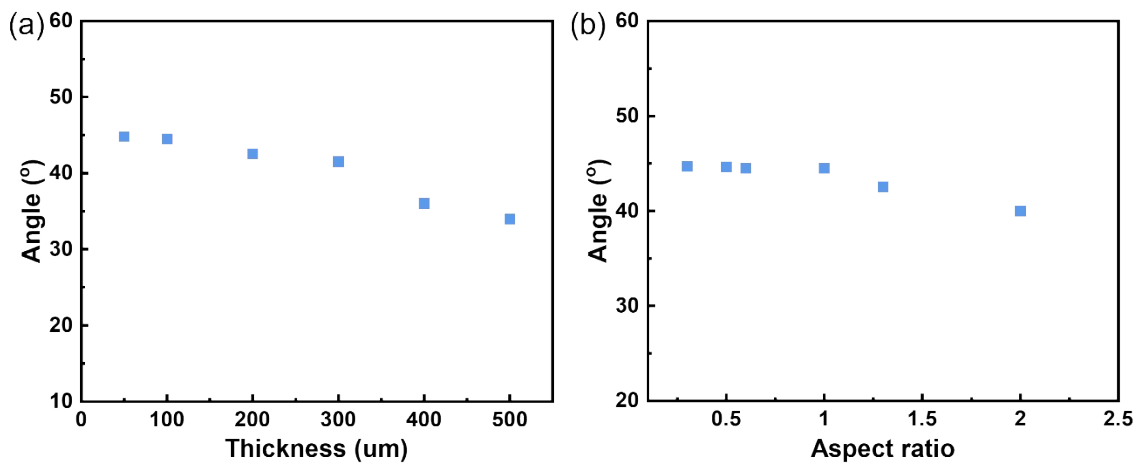

**Figure S8.** a) The tangent angle  $\theta$  vs thickness of PDMS layer of the actuator (the thickness of LCE layer is about 200  $\mu\text{m}$ ) and b) the tangent angle  $\theta$  vs aspect ratio of the actuator, the thickness of LCE and PDMS layer is 200 and 100  $\mu\text{m}$ , respectively.

**Table S1.** Response time along with the thickness of PDMS layer

| Thickness of PDMS ( $\mu\text{m}$ ) | 50 | 100 | 200 | 300  | 400 | 500 |
|-------------------------------------|----|-----|-----|------|-----|-----|
| Response time (s)                   | 37 | 40  | 43  | 43.5 | 45  | 46  |
